# Supplementary material
Source: PubMed Central journal article supplement (PMC8349930)
Supplement: NIHMS1672577-supplement-1.pdf [file NIHMS1672577-supplement-1.pdf]

**Supplemental Table 1. Associations of types of baseline and 6-month follow-up moderate-vigorous physical activity with BMD-defined osteoporosis in participants treated with aromatase inhibitors**

| BASELINE                                 | Osteoporosis | No           | Unadjusted model* | Age adjusted model* | Fully adjusted model*† |
|------------------------------------------|--------------|--------------|-------------------|---------------------|------------------------|
|                                          |              | Osteoporosis | HR (95% CI)       | HR (95% CI)         | HR (95% CI)            |
| <b>Aerobic Exercise (min/wk)</b>         |              |              |                   |                     |                        |
| Tertile 1 (4-68)                         | 54           | 345          | 0.97 (0.65, 1.46) | 0.99 (0.66, 1.49)   | 1.38 (0.91, 2.10)      |
| Tertile 2 (69-180)                       | 57           | 320          | 1.00 (0.67, 1.50) | 1.11 (0.74, 1.66)   | 1.33 (0.88, 2.01)      |
| Tertile 3 (181-1,838)                    | 41           | 252          | 1.00              | 1.00                | 1.00                   |
| p for trend                              |              |              | 0.88              | 0.94                | 0.14                   |
| <b>Aerobic Exercise (min/wk)</b>         |              |              |                   |                     |                        |
| median (range) = 113 (4-1,838)           |              |              |                   |                     |                        |
| None‡                                    | 86           | 496          | 0.87 (0.63, 1.21) | 1.07 (0.77, 1.48)   | 1.32 (0.94, 1.85)      |
| <150 minutes/week                        | 89           | 541          | 0.98 (0.71, 1.35) | 1.01 (0.73, 1.39)   | 1.20 (0.87, 1.67)      |
| ≥150 minutes/week                        | 63           | 376          | 1.00              | 1.00                | 1.00                   |
| <b>Resistance Exercise (min/wk)</b>      |              |              |                   |                     |                        |
| median (range) = 68 (4-540)              |              |              |                   |                     |                        |
| None‡                                    | 142          | 885          | 0.83 (0.59, 1.16) | 0.84 (0.6, 1.18)    | 1.01 (0.71, 1.43)      |
| Below median                             | 53           | 303          | 1.07 (0.71, 1.6)  | 0.93 (0.62, 1.39)   | 0.98 (0.65, 1.47)      |
| Above median                             | 43           | 224          | 1.00              | 1.00                | 1.00                   |
| <b>Weight-training Exercise (min/wk)</b> |              |              |                   |                     |                        |
| median (range) = 34 (4-450)              |              |              |                   |                     |                        |
| None‡                                    | 194          | 1158         | 0.75 (0.48, 1.15) | 0.8 (0.52, 1.23)    | 0.97 (0.62, 1.51)      |
| Below median                             | 21           | 148          | 0.77 (0.42, 1.39) | 0.71 (0.39, 1.29)   | 0.74 (0.41, 1.35)      |
| Above median                             | 23           | 105          | 1.00              | 1.00                | 1.00                   |
| 6-MONTH FOLLOW-UP                        | Osteoporosis | No           | Unadjusted model* | Age adjusted model* | Fully adjusted model*† |
|                                          |              | Osteoporosis | HR (95% CI)       | HR (95% CI)         | HR (95% CI)            |
| <b>Aerobic Exercise (min/wk)</b>         |              |              |                   |                     |                        |
| Tertile 1 (4-68)                         | 31           | 232          | 0.61 (0.37, 1.01) | 0.72 (0.43, 1.19)   | 0.90 (0.54, 1.51)      |
| Tertile 2 (69-180)                       | 30           | 210          | 0.65 (0.39, 1.07) | 0.72 (0.44, 1.20)   | 0.75 (0.45, 1.26)      |
| Tertile 3 (181-1,260)                    | 30           | 147          | 1.00              | 1.00                | 1.00                   |
| p for trend                              |              |              | 0.07              | 0.21                | 0.71                   |

**Aerobic Exercise (min/wk)**

median (range) = 101 (4-1,260)

|                   |    |     |                   |                   |                   |
|-------------------|----|-----|-------------------|-------------------|-------------------|
| None‡             | 75 | 395 | 1.00 (0.68, 1.48) | 1.18 (0.80, 1.75) | 1.52 (1.01, 2.27) |
| <150 minutes/week | 53 | 360 | 0.87 (0.57, 1.32) | 0.95 (0.63, 1.45) | 1.12 (0.74, 1.71) |
| ≥150 minutes/week | 38 | 229 | 1.00              | 1.00              | 1.00              |

**Resistance Exercise (min/wk)**

median (range) = 68 (4-540)

|              |     |     |                   |                   |                   |
|--------------|-----|-----|-------------------|-------------------|-------------------|
| None‡        | 104 | 637 | 0.92 (0.59, 1.44) | 0.99 (0.63, 1.54) | 1.24 (0.79, 1.96) |
| Below median | 38  | 191 | 1.24 (0.75, 2.07) | 1.23 (0.74, 2.05) | 1.31 (0.78, 2.19) |
| Above median | 24  | 144 | 1.00              | 1.00              | 1.00              |

**Weight-training Exercise (min/wk)**

median (range) = 34 (4-270)

|              |     |     |                   |                  |                   |
|--------------|-----|-----|-------------------|------------------|-------------------|
| None‡        | 134 | 823 | 0.95 (0.49, 1.87) | 1.1 (0.56, 2.17) | 1.45 (0.73, 2.89) |
| Below median | 19  | 84  | 1.55 (0.7, 3.43)  | 1.63 (0.74, 3.6) | 1.72 (0.78, 3.82) |
| Above median | 9   | 57  | 1.00              | 1.00             | 1.00              |

---

\*Royston-Parmar proportional hazards models using interval censoring with follow-up until osteoporosis, disenrollment from health plan, death, or end of study, whichever occurred first

†Adjusted for age, menopausal status, race/ethnicity, BMI, AJCC stage, breast cancer treatment, prior major osteoporotic fracture

‡Includes never or less than once per month
